# Supplementary material
Source: Frontiers journal article supplement (https://www.frontiersin.org/articles/497729)
Supplement: Table_1.XLSX [file Table_1.XLSX]

## Sheet: Hoja1
Scientific name	Common name	Economic and geografhiccal region
Amaranthus hybridus L.	Quelite blanco	Noreste, Centro-Occidente, Golfo, Centro-Este, Sur
Solanum nigrescens	Quelite morado	Noroeste, Noreste, Golfo, Sur
Chenopodium berlandieri	Quelite cenizo, Nexuaquilit	Norte, Centro-Este, Sur
Amaranthus hypochondriacus	Quelite rojo, quintonil, semilla de bledo	Centro-Este
Crotalaria langirostrata	Chipil	Golfo, Sur
Chenopodium album L.	Hediondilla	Centro-Occidente
Porophyllum macrocephalum	Pápalo quelite	Centro-Este
Cnidoscolus chayamansa	Chaya	Noroeste, Centro-Occidente, Noreste, Peninsula de Yucatán, Sur, Golfo
Portulaca oleracea L.	Verdolaga	Noroeste, Norte, Centro-Occidente, Península de Yucatán, Centro-Este, Sur
Suaeda mexicana, calceoliformis	Romeritos	Norte, Centro-Este
Nasturtium officinale	Berros	Noroeste, Norte, Noreste, Centro-Occidente, Sur,
Rumex crispus L.	Lengua de vaca, epazote	Norte, Noroeste, Centro-Occidente, Centro-Este
Calandrinia micrantha	Chivitos	Centro-Este
Chenopodium ambrosioides L. (Dysphania ambrosioides)	Epazote	Noroeste, Norte, Noreste, Península de Yucatán, Centro-Este, Sur
Porophyllum linaria, linarifolium, tenuifolium	Chepiche, cola de coyote, escobeta, hierba del venado	Centro-Este
Amaranthus palmeri	Quelite	Noroeste, Norte, Centro-Occidente
Solanum americanum L.	Hierbamora, Tomalquilit	Noroeste, Golfo, Sur
Porophyllum tagetoides	Pipicha	Centro-Este
Tinatia erecta	Hierba de cantil, Ohuaquilit	Centro-Este
Xanthoosma robustum	Hoja de pato o elegante, Mafafa, Capote	Noreste, Centro-Occidente, Centro-Este, Sur
Acacia acatlensis	Yepaquilitl, borreguitos, guajillo, guayalote, acacia	Noroeste, Centro-Occidente, Sur
Phytolacca icosandra	Jaboncillo, perla china, amolquilit	Centro-Este, Sur
Anoda cristata L.	Alache, rehueque	Norte, Noreste, Centro-Este, Sur
Anredera leptostachys	Sacasil	Noreste, Centro-Este
Batis maritima L	Saladilla, alambrillo, perejil silvestre	Noroeste, Golfo, Peninsula de Yucatán
Hechtia glomerata	Guapilla china, bromelia	Norte, Noreste, Sur
Commelina difFusa	Pata de pollo	Noroeste, Norte, Noreste, Centro-Occidente, Sur
Hydrocotyle ranunculoides L.	Malacote. ombligo de Venus, redondita de aga	Noroeste, Centro-Este
Piper auritum	Hoja santa, omequelite	Centro-Este
Begonia barkerii	Tepexocoyolli, xiciyoli	Golfo, Sur
Gallinsoga parviflora	Piojito	Sur
Xanthosoma sagittifolium L.	Malanga	Golfo, Sur
Origanum majorana	Mejorana, oregano	Centro-Este, Golfo
Raphanus sativus L.	Hoja de rábano	Noroeste, Noreste, Sur, Centro-Occidente, Centro-Este, Golfo
Beta vulgaris L.	Hojas de betabel	Noroeste, Centro-Este, Centro-Occidente
Euphorbia graminea	Lecheroncilla, onob-kax	Sur
Cyclanthera langaei	Macualquilitl	Golfo, Centro-Occidente, Noreste, Noroeste
Cyclanthera ribiflora	Huihuila	Centro-Este
Amaranthus cruentus L.	Iztaquilitl	Centro-Este
Taraxacum officinale W.	Diente de León, achicoria, lecuhguilla	Centro-Este, Centro-Occidente. Noroeste
Pachycereus pringlei	Flor de cardón, sagüara	Noroeste
Ferocactus pilosus	Flor de cactus, cabuches, barril de lima	Noreste
Yucca elephantipes regel	Flor de yuca, palmita	Golfo
Cucúrbita mexicana L.	Flor de calabaza	Centro-este, Noroeste
Agave lechugilla	Flor de quiote	Noroeste
Erythrina americana	Colorín, Flor de gasparito	Centro-Este, Norte, Peninsula de Yucatán
Jaltomata procumbens	Flor de chocho, Xaltotompe	Centro-Occidente, Golfo, Centro-Este, Sur
Ptelea trifoliata L.	Flor de pinacatillo, zorrillo	Norte, Noreste, Centro-Este
Canaglia villosa	Flor de gallo, gallinitas	Centro-Occidente, Noreste
Cercis canadensis L.	Flor de pata de vaca	Noreste
Fouquieria Splendens	Flor de palo de judas, ocotillo, cardo santo	Norte, Noreste, Noroeste
Phaseolus polyanthus	Plántulas de frijol, etquiltapan, gordo, guías de frijol, esoquilit	Golfo, Sur
Pisum sativum	Guías de alverjón	Centro-Este, Sur
Sechium edule	Guías de chayote, chayoquilit	Centro-Este, Centro-Occidente
Leucaena esculenta	Retoños de guaje	Centro-Este, Centro-Occidente
Cucúrbita pepo L.	Guía de calabaza	Centro-Occidente, Sur
Chenopodium berlandieri ssp.	Huauzontle	Centro-Occidente, Centro-Este
Chamaeodorea tepejilote	Tepejilote, cola de pescado	Golfo, Sur
Bidens odorata Cav.	Mozote, aceitilla	Noroeste, Norte, Centro-Este
Amaranthus blitoides	Quelite de agua	Noreste
Descurainia pinnata susp.halictorum	Tanceto de mostaza	Noroeste
Yucca grandiflora	Izote de Sahuiliqui, Plantas de Saravique	Noroeste
Cirsium mexicanu, Stymaphyllon lindenianum	Chinaca, cardo santo, hoja de chayote	Norte
Phaseolus vulgaris	Ejotes	Norte
Papaver rhoeas	Amapola silvestre	Norte
Lepidium virginicum	Quelite pata de cuervo, lentejilla de campo, mixixi	Noroeste, Norte, Noreste, Centro-Este, Sur
Boletus appendiculatus	Hongora, hongo hongorado	Noroeste
Portulaca umbraticola	Verdolaga	Noroeste
Solanum nigrum	Chichiquelite, tomatillo, hierba mora	Noroeste, Sur
Chenopodium neomexicanum	Choal	Noroeste
Allium rhizomatum	Cebolla de monte	Norte, Sur
Amaranthus retroflexus	Amaranto	Norte, Centro-Occidente
Arracacia edulis		Norte
Bidens pilosa	Sepé, Acahual, acahuale blanco, aceitilla, hierba de culebra	Norte, Sur
Cosmos parviflorus	Aceitilla blanca, zacate de gujugue	Norte
Dalea sp.	Mezquitillo, toronjil	Norte
Dryopetalon runcinatum var. Laxiflorum	Chichiquelite	Norte
Gallinsoga semicalva	Estrellita, guasca	Norte
Ipomoea hirsutula	Trompillo	Norte
Monarda austromontana	Oreéano	Norte
Simsia eurylepis	Polote	Norte
Solanum gracile	Chichiquelite, mambia	Norte
Tauschia tarahumara	Basiáwari, triguillo silvestre	Norte
Urtica dioica	Flor de ortiga, ortiguille, chichicaxtle	Norte
Stellaria media	Hierba gallinera, hierba de pollo	Noreste
Scirpus validus	Tule	Noreste
Phragmites australis	Carrizo, zacate, carrizillo, ácatl	Noreste
Talinum diffusum	Rama de sapo, hierba de cacolote, mañanita	Noreste
Chenopodium murale	Gedeondilla, hediondilla, tlanechquelite	Centro-Occidente, Centro-Este
Physalis angulata	Tomatillo silvestre	Centro-Occidente
Physalis leptophylla	Tomate de monte	Centro-Occidente
Solanum berrucosum	Papa silvestre	Centro-Occidente
Solanum stoloniferum	Papa cimarrona	Centro-Occidente
Cestrum racemosum	Zorrillo	Golfo, Sur
Witheringia meiantha	Ashenté	Golfo, Sur
Acalypha macrostachya	Cola de gato, corneta	Golfo, Sur
Allium kunthii	Cebollín, cebolla cimarrona	Centro-Este, Sur
Rumex mexicanus	Lengua de vaca	Centro-Este, Sur
Suaeda edulis	Romerito	Centro-Este
Capsicum annum var. Glabriusculum	Ají pajarito, chile piquín, chiltepín	Centro-Este, Sur
Cnidoscolus multilobus	Mala mujer, ortiga	Centro-Este
Comelina sp.	Hierba del pollo, mataliste, rosilla, tetzocana	Centro-Este
Cyclanthera dissecta	Chayotillo	Centro-Este
Echinopepon milleflorus	Espinosollo	Centro-Este
Hybanthus verticillatus	Ipecacuana	Centro-Este
Lycianthes stephanocalyx		Centro-Este, Sur
Mimulus guttatus	Lantén cimarrón	Norte, Centro-Este
Oxalis albicans	Xocoyol	Noroeste, Centro-Este
Physalis gracilis	Tomate de cascara	Centro-Este
Phytolacca purpurascens	Mazorquilla, amole, barbachina, higuerilla	Centro-Este
Phytolacca ribivinoides	Guaparrón, jaboncillo	Centro-Este
Porophyllum coloratum	Hierba del venado, maravilla, chivatillo, pipicha	Centro-Este, Sur
Porophyllum ruderale subsp. Macrocephalum	Papaloquelite	Centro-Este, Sur
Tauschia nudicaulis		Centro-Este
Witheringia solanacea	Hierba mora cimarrona	Centro-Este
Ipomoea lazanii		Centro-Este
Ipomoea pubenscens	Trompillo	Centro-Este
Solanum schenkii		Centro-Este
Amaranthus spinosus	Amaranto espinoso, quelite blanco, epazote de mula	Centro-Este
Arthrostemma ciliatum	Acedillo, xocoyolli	Centro-Este
Cleome pilosa	Alcachofa, cachofla	Centro-Este
Cleome speciosa	Barba de chivo, charamusca	Centro-Este
Eryngium foetidum	Cilantro cimarrón, Coyote, Perejil	Centro-Este, Sur
Lycianthes geminiflora		Centro-Este
Physalis aff. Greemanii		Centro-Este
Adelia barbinervis	Espino blanco, limocillo	Centro-Este
Amaranthus crassipes	Amaranto	Centro-Este
Begonia modesta	Gorupito	Centro-Este
Boerhavia erecta	Golondrina, hierba blanca	Centro-Este
Chamissoa altissima	Bejuco de agua, barbas de viejo, cuamecate	Centro-Este
Clidemia petiolaris	Capulincillo	Centro-Este
Croton reflexifoluis	Palo santo, cascarillo	Centro-Este
Echites panduratus	Loroco	Centro-Este, Sur
Ipomoea dumosa	Quelite, sayu	Centro-Este
Ipomoea seducta		Centro-Este
Lobelia berlandieri	Hierba del pajaro, moradilla	Centro-Este
Merremia quinquefolia	Cinco hojas, quiebra cantaro	Centro-Este
Oxalis corniculata	Acedera, agritos, socoyol	Centro-Este
Oxalis latifolia	Agrios, trébol silvestre	Centro-Este
Peperomia cf. Bernoulli		Centro-Este
Peperomia denticularis	Quelite de venado	Centro-Este
Peperomia maculosa		Centro-Este
Smilax domingensis	Cocolmexa, bejuco de chiquihuite	Centro-Este
Stellaria ovata	Hierba del aire, quelite de llovizna, ahuexquilitl	Centro-Este
Talinum paniculatum	Quelite de minte, belladona, oreja de ratón	Centro-Este
Talinum triangulare	Rama de sapo	Centro-Este, Sur
Asclepias sp.	Algodoncillo	Sur
Byttneria aculeata	Garabato, uña de gato	Sur
Crotalaria pumila	Chipil, garbancillo	Sur
Daucus montanus	Zanahoria de monte	Sur
Galinsoga parviflora	Estrellita, guasca	Sur
Melothria pringlei	Sandía cimarrona	Sur
Polanisia uniglandulosa	Ortiga, hierba del coyote	Sur
Salpianthus purpurascens	Quelite de marrano, yiwa-quini	Sur
Solanum lesteri	Papa silvestre	Sur
Solanum polyadenium	Papa silvestre	Sur
Ipomoea bracteata	Azalea de barranca, bejuco blanco, empanada	Sur
Tridax coronopifolia	Coronilla, matitas de playa, hierba de conejo	Sur
Amaranthus scariosus		Sur
Boerhavia diffusa	Arete, golondrina, palo de agua, siempreviva	Sur
Cleome magnifica	Alcahofa. Azul	Sur
Cnidoscolus aconitifolius	Mala mujer, chaya, picar, chicasquil	Sur
Crotalaria incana	Cascabelito, frijolillo, tronadora	Sur
Gallinsoga quadriradiata	Guasca	Sur
Metelea aspera		Sur
Senna fructicosa	Caña fistola, palo liso, vainilla	Sur
Roldana greenmanii	Hedindiolla	Sur
Sprekelia formosissima	Flor de mayo, lirio azteca	Centro-Este, Centro-Occidente, Norte, Noroeste
Hypanus dipterurus	Raya látigo redonda	Noroeste, Centro-Occidente
Hypanus longus	Raya látigo	Noroeste
Myliobatis longirostris	Raya águila	Noroeste
Mobula birostris	Manta voladora	Noroeste, Golfo
Gymnura marmorata	Raya mariposa californiana	Noroeste
Gymnura crebipunctata	Raya mariposa picuda	Noroeste
Styracura pacifica	Raya coluda del pacífico	Sur
Urobatis halleri	Raya redonda común	Noroeste
Urobatis maculatus	Raya redonda de Cortés	Noroeste, Sur, Centro-Occidente
Urotrygon rogersi	Raya redonda	Centro-Occidente, Sur
Aetobatus narinari	Raya pinta	Península de Tucatán, Sur, Centro-Occidente
Rhinoptera steindachneri	Raya tecolote	Sur, Noroeste
Raja texana	Raya tigre	Golfo
Raja velezi	Raya chillona	Noroeste
Narcine entemedor	Raya eléctrica gigante	Noroeste
Zapteryx exasperata	Guitarra rayada	Noroeste
Sphyrna zygaena	Cornuda prieta	Noroeste
Triakis semifasciata	Tiburón leopardo	Noroeste
Carcharhinus limbatus	Tiburón puntas negras	Noroeste
Carcharhinus leucas	Tiburón toro	Península de Yucatán, Noroeste
Carcharhinus porosus	Tiburón poroso	Península de Yucatán
Prionace glauca	Tiburón azul	Noroeste
Isurus oxyrinchus	Mako	Noroeste, Península de Yucatán
Alopias vulpinus	Tiburón ratón	Noroeste
Squatina californica	Tiburón angelito	Noroeste
Menippe mercenaria	Cangrejo moro	Península de Yucatán
Romaleon antennarium	Cangrejo de rocas del pacífico	Noroeste
Callinectes sapidus	Jaiba azul	Península de Yucatán, Golfo, Noreste
Cambarellus montezumae	Acocil	Centro-Este
Atya scabra	Burro	Golfo, Sur
Macrobrachium americanum	Langostino de Río	Centro-Occidente
Macrobrachium rosembergii	Langostino malayo	Noreste, Cetro-Occidente, Centro-Este, Norte
Macrobrachium acanthurus	Langostino prieto	Noreste
Macrobrachium carcinus	Acamaya	Sur, Golfo, Noreste
Macrobrachium tenellum	Chacal	Sur, Centro-Occidente
Panulirus gracilis	Langosta verde o barbona	Noroeste
Panulirus inflatus	Langosta azul	Noroeste
Panulirus penicillatus	Langosta de revillagigedo	Sur
Panulirus argus	Langosta del Caribe	Penísnula de Yucatán, Golfo
Panulirus interruptus	Langosta de California	Noroeste
Farfantepenaeus aztecus	Camarón café	Golfo
Farfantepenaeus californiensis	Camarón café o caqui, patiamarillo	Noroeste
Sicyonia disdorsalis	Camarón piedra	Noroeste
Sicyonia penicillata	Camarón japonés	Noroeste
Litopenaeus occidentalis	Camarón blanco del Pacífico	Noroeste
Litopenaeus stylirostris	Camarón azul	Noroeste
Litopenaeus vannamei	Camarón blanco	Noroeste
Callinectes bellicosus	Jaiba verde	Noroeste
Callinectes arcuatus	Jaiba azul	Noroeste
Megapitaria aurantiaca	Almeja chocolata	Noroeste
Megapitaria squalida	Almeja chocolate	Noroeste
Atrina (Servatrina) maura	Callo de hacha	Noroeste. Centro-Occidente
Dosidicus gigas	Calamar gigante	Noroeste
Octopus vulgaris	Pulpo roca del Atlántico, Pulpo patón	Penísnula de Yucatán, Golfo
Octopus maya	Pulpo rojo	Penísnula de Yucatán
Lithobates catesbaianus	Rana toro	Centro-Occidente
Lithobates montezumae	Rana leopardo de Moctezuma	Centro-Occidente
Ambystoma taylori	Ajolote de Acchichica	Centro-Este
Ambystoma mexicanum	Ajolote de Xochimilco	Centro-Este
Ambystoma andersoni	Achoque de Zacapu	Centro-Occidente
Ambystoma tigrinum	Ajolote atigrado	Centro-Este, Noroeste
Ambystoma dumerilii	Achoque de Pátzcuaro	Centro-Occidente
Crocodylus moreletii	Cocodrilo de pantano	Golfo, Peninsula de Yucatán, Sur, Noreste (Tamaulipas)
Crotaphytus collaris	Lagartija de collar del antiplano	Noreste
Gambelia wislizenii	Lagartija leopardo narigona	Noroeste, Noreste
Iguana iguana	Iguana verde	Sur, Golfo, Peninsula de Yucatán, Noroeste
Dipsosaurus dorsalis	Iguana de desierto	Noroeste
Sceloporus spinosus	Lagartija espinosa mexicana	Centro-Occidente, Sur
Holbrookia maculata	Lagartija sorda menor	Norte, Noreste, Noroeste
Chelonia mydas	Tortuga prieta	Peninsula de Yucatán, Golfo, Sur
Lepidochelys olivacea	Tortuga golfina	Sur, Centro-Occidente
Dermatemys mawii	Tortuga blanca	Peninsula de Yucatán
Staurotypus triporcatus	Guao tres lomos	Sur
Kinosternon leucostomum	Tortuga pecho quebrado labios blancos	Golfo
Lobatus gigas	Caracol rosado, caracol burro	Peninsula de Yucatán
Megathura crenulata	Concha lapa	Noroeste
Haliotis cracherodii	Abulón negro	Noroeste
Haliotis rufescens	Abulón rojo	Noroeste
Haliotis fulgens	Abulón azul	Noroeste
Haliotis corrugata	Abulón amarillo	Noroeste
Haliotis sorenseni	Abulón blanco	Noroeste
Dosidicus gigas	Calamar gigante	Noroeste
Octopus maya	Pulpo rojo	Peninsula de Yuacatán, Golfo
Octopus vulgaris	Pulpo de roca del Atlántico	Peninsula de Yucatán, Golfo, Noroeste
Rangia cuneata	Almeja gallito	Noroeste
Chione californiensis	Almeja arrocera	Noroeste
Chione undatella	Almeja roñosa del Golfo de Baja California	Noroeste
Tivela stultorum	Almeja pismo	Noroeste
Megapitaria aurantiaca	Almeja chocolata	Noroeste
Zirfeae pilsbryi	Pata de cabra	Noroeste
Crassostrea gigas	Ostión japonés	Noroeste
Atrina rigida	Callo de hacha	Peninsula deYucatán, Golfo
Geukensia demissa	Mejillón	Peninsula de Yucatán
Modilus americanus	Mejillón tulipán	Noreste, Peninsula de Yucatán
Mytilus californianus	Mejillón de california	Noreste
Didelphis marsupialis	Tlacuache sureño	Sur, Golfo
Trichechus manatus	Manatí del Caribe	Peninsula de Yucatán, Golfo
Dasypus novemcinctus	Armadillo nueve bandas	Noroeste, Centro-Occidente, Noreste, Sur
Sylvilagus conicularius	Conejo de Monte	Noroeste, Centroeste, Sur
Sylvilagus brasiliensis	Conejo tropical	Golfo, Norte
Sylvilagus floridanus	Conejo serrano	Noreste, Norte, Centro-Occidente
Sylvilagus bachmani	Conejo matorralero	Noroeste
Sylvilagus audubonii	Conejo del desierto	Norte, Noreste, Noroeste
Lepus insularis	Liebre negra	Noroeste
Lepus callotis	Liebre torda	Centro-occidente, Norte
Lepus californicus	Liebre cola negra	Norte, Noreste, Noroeste
Lepus alleni	Liebre antilope	Noroeste
Lepus favigularis	Liebre de Tehuantepec	Sur
Romerolagys diazi	Teporingo	Centro-Este
Alouatta palliata	Saraguanto de Manto	Sur
Ateles geoffroyi	Mono araña	Península de Yucatán, Sur, Golfo
Sciurus aureogaster	Ardilla vientre rojo	Centro-Este, Sur, Centro-Occidente, Norte
Sciurus aberti	Ardilla de Albert	Norte
Sciurus niger	Ardilla zorra	Norte
Sciurus nayaritensis	Ardilla de Nayarit	Noroeste, Norte
Dasyprocta punctata	Guaqueque centroamericano	Península de Yucatán, Sur, Golfo
Dasyprocta mexicana	Tepezcuintle, Guaqueque mexicano	Golfo, Sur
Neotoma albigula	Rata magueyera, cambalachera	Noroeste
Neotoma micropus	Rata de campo/pradera	Noreste
Odocoileus hemionus	Venado bura	Noroeste, Norte
Odocoileus virginianus	Venado cola blanca	Toda la república
Bos taurus	Ganado vacuno	Toda la república
Ovis aries	Borrego doméstico	Centro-occidente, Norte
Ovis canadensis	Borrego cimarrón	Norte, Noroeste
Procyon lotor	Mapache	Toda la república
Nasua narica	Coatí, tejón	Golfo
Leopardus pardalis	Ocelote	Noroeste, Sur
Tapirus bairdii	Tapir centroamericano	Sur
Pecari tajacu	Jabalí de collar, báquira, coyamel	Sur, Penisula de Yiucatán
Thomomys umbrinus	Tuza mexicana	Norte, Noroeste, Noreste, Centro-Occidente, Centro-Este
Pappogeomys bulleri	Tuza de Jalisco	Centro-Occidente
Struthio camelus	Avestruz
Tinamus major	Tinamú mayor, pérdiz	Sur, Golfo
Patagioenas nigrirostris	Paloma triste	Sur, Golfo
Patagioenas speciosa	Paloma escamosa	Península de Yucatán
Patagioenas fasciata	Paloma encinera	Noroeste, Norte, Centro-Occidente
Zenaida macroura	Huilota común	Toda la república
Zenaida asiatica	Paloma alas blancas	Toda la república
Geotrygon montana	Paloma canela	Sur, Golfo
Zentrygon albifacies	Paloma cara blanca	Sur
Colinus nigrogularis	Codorniz yucateca	Peninsula de Yucatán
Dendrortyx leucophrys	Codorniz coluda centroamericana	Sur
Dendrortyx barbatus	Codorniz coluda veracruzana	Golfo
Dendrortyx macroura	Codorniz coluda transvolcánica, pérdiz	Centro-Occidente, Sur
Dactylortyx thoracicus	Codorniz silbadora	Peninsula de Yucatán, Noreste, Noroeste
Odontophorus guttatus	Codorniz bolonchaco	Sur
Cyrtonyx montezumae	Codorniz de Moctezuma	Centro-Occidente, Norte, Noreste
Oreortyx pictus	Codorniz de Montaña	Noroeste
Callipepla californica	Codorniz californiana	Noroeste
Callipepla douglasii	Codorniz cresta dorada	Noroeste
Callipepla squamata	Codorniz escamosa	Noreste, Norte, Centro-Occidente
Anser albifrons	Ganso Careto Mayor	Noreste, Norte, Centro-Occidente
Anser rossii	Ganso de Ross	Norte
Dendrocygna autumnalis	Pipije alas blancas	Toda la república
Spatula cyanoptera	Cerceta canela	Toda la república
Spatula discors	Cerceta las azules	Toda la república
Pelecanus erythrorhynchos	Pelicano blanco americano	Toda la república
Meleagris gallopavo	Guajolote norteño	Toda la república
Meleagris ocellata	Guajolote ocelado	Peninsula de Yucatán
Penelope purpurascens	Pava cojalita	Sur, Centro-Occidente, Noreste
Crax rubra	Hocofaisán	Sur, Noreste
Philortyx fasciatus	Codorniz barrada	Sur, Centro-Occidente
Branta canadiensis	Ganso canadiense mayor	Norte
Anser caerulescens	Ganso blanco	Norte
Anas crecca	Cerceta alas verdes	Norte, Centro-Occidente
Penelopina nigra	Pajuil	Sur
Ortalis vetula	Chachalaca oriental	Noreste, Penisnula de Yucatán, Golfo, Sur
Ortalis policephala	Chachalaca pálida	Sur, Centro-Occidente,Centro-Este
Callipepla gambelii	Codorniz de Gambel	Noroeste
Colinus virginianus	Codorniz catuí	Noreste, Sur, Centro-Occidente
Antigone canadiensis	Grulla gris	Noreste, Norte
Fulica americana	Gallareta americana	Toda la república
Cairina moschata	Pato real	Noreste, Golfo, Penisnusla de Yucatán, Sur, Centro-Occidente, Noroeste
Charadrius vociferus	Chichicuilote	Toda la república
Anas platyrhynchos diazi	Pato mexicano	Norte, Noroeste, Noreste, Centri-Occidente, Centro-Este, Golfo
Cambarellus montezumae	Acocil del valle de toluca, Langostino de río, chacalín	Centro-Este
Panulirus argus	Langosta espinosa del banco chinchorro y sian ka´an, chakay	Península de Yucatán,Golfo
Atractosteus tropicus	Pejelagarto, catán	Sur
Chirostoma estor	Pescado blanco del lago de patzuaro	Centro-Occidente
Lobatus gigas	Caracol rosado, teccizmama, caracol pala	Peninsula de Yucatán
Algansea lacustris	Acúmara de lago	Centro-Occidente
Totoaba macdonaldi	Totoaba, corvina blanca, cabicucho, machorro	Noroeste
Joturus pichardi	Bobo, trucha de tierra caliente, cuyamel	Golfo
Abudefduf saxatilis	Petaca rayada	Peninsula de Yucatán
Lagocephalus laevigatus	botete grande	Peninsula de Yucatán, Golfo
Sphoeroides angusticeps	Botete cabeza corta	Noroeste
Sphoeroides annulatus	Botete diana	Noroeste
Sphoeroides testudineus	Botete sapo	Peninsula de Yucatán
Sphyraena argentea	barracuda plateada	Noroeste
Sphyraena barracuda	Barracuda gigante	Peninsula de Yucatán, Golfo
Sphyraena ensis	barracuda mexicana	Noroeste
Balistes capriscus	Pejepuerco blanco	Golfo, Peninsula de Yucatán
Balistes polylepis	cochi	Noroeste, Sur
Sufflamen verres	cochito naranja	Noroeste, Centro-Occidente
Canthidermis maculata	cochito manchado	Peninsula de Yucatán
Pseudobalistes naufragium	cochito bota	Noroeste
Mulloidichthys dentatus	Chivo barbón	Noroeste, Sur
Pseudupeneus grandisquamis	Chivo escamoso	Noroeste
Oligoplites saurus	Piña sietecueros	Noreste
Trachinotus carolinus	Pámpano amarillo	Peninsula de Yucatán
Trachinotus goodei	Pámpano listado	Peninsula de Yucatán
Trachinotus kennedyi	Pá¡mpano plateado	Noroeste
Trachinotus paitensis	Pámpano paloma	Noroeste
Trachinotus rhodopus	Pámpano fino	Noroeste, Sur
Seriola lalandi	medregal rabo amarillo	Noroeste
Seriola zonata	Medregal rayado	Peninsula de Yucatán
Elagatis bipinnulata	macarela salmÃ³n	Peninsula de Yucatán, Noreste
Caranx caballus	Cocinero	Noroeste, Sur
Caranx caninus	Jurel toro	Noroeste, Sur
Caranx crysos	cojinuda negra	Golfo
Caranx hippos	Jurel amarillo comÃºn	Peninsula de Yucatán, Golfo
Caranx latus	Jurel blanco	Peninsula de Yucatán
Caranx lugubris	jurel negro	Golfo
Caranx ruber	Cojinuda carbonera	Peninsula de Yucatán
Caranx sexfasciatus	Jurel voraz	Noreste
Carangoides otrynter	Jurel de hebra	Noreste
Carangoides bartholomaei	Cojinuda amarilla	Peninsula de Yucatán, Golfo
Selene brevoortii	jorobado mexicano	Noreste
Selene orstedii	jorobado carite	Centro-Occcidente
Selene setapinnis	jorobado caballa	Golfo
Selene vomer	jorobado penacho	Golfo
Chloroscombrus orqueta	horqueta del PacÃ­fico	Golfo
Decapterus muroadsi	macarela mexicana	Centro-Occcidente
Hemicaranx zelotes	jurelito chocho	Noroeste
Trachurus lathami	charrito garretÃ³n	Golfo
Trachurus symmetricus	charrito chÃ­charo	Noroeste
Pomacanthus arcuatus	Gallineta cafÃ©	Peninsula de Yucatán
Sphyraena argentea	barracuda plateada	Noroeste
Sphyraena barracuda	Barracuda gigante	Peninsula de Yucatán, Golfo
Sphyraena ensis	barracuda mexicana	Noroeste
Sphyraena lucasana	barracuda de CortÃ©s	Noroeste
Sphyrna zygaena	Cornuda prieta	Noroeste
Acanthocybium solandri	peto	Peninsula de Yucatán
Scomberomorus maculatus	Sierra comÃºn	Golfo
Katsuwonus pelamis	Barrilete listado	Peninsula de Yucatán, Golfo
Sarda chiliensis	Bonito del Pacífico oriental	Noroeste
Sarda orientalis	Bonito	Sur
Thunnus alalunga	albacora	Golfo
Thunnus albacares	AtÃºn aleta amarilla	Noroeste, Centro-Occidente
Thunnus atlanticus	atÃºn aleta negra	Golfo
Thunnus obesus	patudo	Golfo
Thunnus thynnus	atÃºn aleta azul	Golfo
Scomber japonicus	macarela estornino	Noroeste
Auxis rochei	Melvera	Golfo
Auxis thazard	melva	Golfo
Euthynnus affinis	bacoreta oriental	Noroeste
Euthynnus lineatus	Barrilete negro	Sur
Ocyurus chrysurus	Rubia	Peninsula de Yucatán
Lutjanus aratus	Pargo de manglar	Sur, Centro-Occidente, Noroeste
Lutjanus argentiventris	Pargo amarillo	Sur, Centro-Occidente, Noroeste
Lutjanus campechanus	Huachinango de Castilla	Peninsula de Yucatán, Golfo
Lutjanus colorado	Pargo colorado	Sur, Centro-Occidente, Noroeste
Lutjanus griseus	Pargo mulato	Peninsula de Yucatán, Golfo
Lutjanus guttatus	Pargo lunarejo	Centro-Occidente, Sur, Noroeste
Lutjanus inermis	Pargo rabirrubia	Sur, Centro-Occidente, Noroeste
Lutjanus jordani	Pargo colmillÃ³n	Sur, Centro-Occidente, Noroeste
Lutjanus novemfasciatus	Pargo prieto	Noroeste, Centro-Occidente, Sur
Lutjanus peru	Huachinango del Pacífico, Pargo rojo	Centro-Occcidente, Sur, Noroeste
Lutjanus synagris	Pargo baijaiba, Rubia	Peninsula de Yucatán
Lutjanus viridis	Pargo azul dorado	Noroeste
Hoplopagrus guentherii	Pargo coconaco	Noroeste, Centro-Occidente
Rhomboplites aurorubens	Besugo	Peninsula de Yucatán, Golfo
Istiophorus platypterus	Pez vela del PacÃ­fico	Noroeste, Centro-Occidente, Sur
Mycteroperca bonaci	Cherna negrillo	Peninsula de Yucatán, Golfo
Mycteroperca rosacea	Cabrilla sardinera	Noroeste, Centro-Occidente, Sur
Mycteroperca xenarcha	Cabrilla plomuda	Noroeste
Epinephelus adscensionis	Cabrilla Payaso verde	Peninsula de Yucatán, Golfo
Epinephelus analogus	cabrilla pinta	Noroeste, Sur, Centro-Occidente
Epinephelus itajara	Mero guasa	Peninsula de Yucatán, Golfo
Epinephelus labriformis	Cabrilla piedrera	Noroeste, Centro-Occidente, Sur
Epinephelus morio	Cherna americana	Peninsula de Yucatán
Epinephelus striatus	Mero del Caribe	Peninsula de Yucatán
Dermatolepis dermatolepis	Cabrilla cueruda, mero cuero	Noroeste, Centro-Occidente
Paranthias furcifer	rabirrubia del Golfo	Golfo
Hyporthodus acanthistius	baqueta	Noroeste, Centro-Occidente, Sur
Diplectrum euryplectrum	serrano extranjero	Noroeste
Diplectrum formosum	serrano arenero	Peninsula de Yucatán, Golfo
Diplectrum pacificum	serrano cabicucho	Noroeste
Paralabrax auroguttatus	Cabrilla extranjera	Noroeste
Paralabrax clathratus	Cabrilla sargacera	Noroeste
Paralabrax loro	Cabrilla cachete amarillo	Noroeste
Paralabrax maculatofasciatus	Cabrilla arenera	Noroeste
Rypticus saponaceus	jabonero grande	Peninsula de Yucatán
Abudefduf saxatilis	Petaca rayada	Golfo
Caulolatilus affinis	conejo	Noroeste
Caulolatilus chrysops	blanquillo ojo amarillo	Golfo, Noroeste
Caulolatilus intermedius	blanquillo payaso	Golfo
Caulolatilus microps	blanquillo lucio	Golfo
Caulolatilus princeps	Blanquillo fino	Noroeste
Larimus acclivis	boquineta	Noroeste, Sur, Centro-Occidente
Cynoscion nebulosus	Corvina pinta	Peninsula de Yucatán
Cynoscion albus	corvina chiapaneca	Sur
Cynoscion nannus	corvina enana	Centro-Occcidente, Sur
Cynoscion othonopterus	Corvina golfina	Noroeste
Cynoscion parvipinnis	corvina aleta corta	Noroeste
Cynoscion reticulatus	Corvina rayada	Noroeste
Cynoscion squamipinnis	corvina aguada	Noroeste
Cynoscion stolzmanni	corvina coliamarilla	Noroeste
Cynoscion xanthulus	Corvina boquinaranja	Noroeste
Pogonias cromis	tambor negro	Golfo
Atractoscion nobilis	Corvina blanca	Noroeste
Bairdiella chrysoura	ronco amarillo	Golfo
Bairdiella icistia	ronco roncacho	Noroeste
Genyonemus lineatus	corvineta blanca	Noroeste
Menticirrhus americanus	Berrugato zorro	Golfo, Peninsula de Yucatán
Menticirrhus elongatus	berrugato fino	Noroeste
Menticirrhus littoralis	berrugato del Golfo	Centro-Occidente, Noroeste
Menticirrhus paitensis	berrugato chulo	Centro-Occcidente, Sur
Menticirrhus saxatilis	berrugato ratón	Golfo, Peninsula de Yucatán
Menticirrhus undulatus	Berrugata californiana	Noroeste
Micropogonias furnieri	chano rayado	Golfo, Peninsula de Yucatán
Micropogonias undulatus	gurrubata	Golfo
Ophioscion strabo	corvineta bizca	Noroeste
Roncador stearnsii	roncador aleta manchada	Noroeste, Centro-Occidente
Totoaba macdonaldi	Totoaba	Noroeste, Centro-Occidente
Umbrina roncador	Berrugata aleta amarilla	Noroeste
Umbrina xanti	berrugata roncadora	Centro-Occcidente
Archosargus probatocephalus	sargo chopa	Noreste, Golfo
Haemulon flaviguttatum	Burro de Cortés	Noroeste, Centro-Occidente
Haemulon maculicauda	Burro rasposo	Noroeste, Centro-Occidente
Haemulon sexfasciatum	burro almejero	Noroeste, Centro-Occidente
Orthopristis chalceus	burrito corcovado	Noroeste, Centro-Occidente
Orthopristis chrysoptera	corocoro armado	Golfo
Orthopristis reddingi	burrito rayado	Noroeste
Anisotremus davidsonii	Sargo rayado	Noroeste
Anisotremus interruptus	burro bacoco	Noroeste
Anisotremus surinamensis	burriquete	Peninsula de Yucatán, Golfo
Coryphaena hippurus	Dorado	Noroeste
Centropomus armatus	Robalo espina larga	Centro-Occcidente
Centropomus medius	Robalo aleta prieta	Centro-Occcidente
Centropomus nigrescens	Robalo negro	Centro-Occcidente, Golfo
Centropomus poeyi	robalo prieto	Golfo
Centropomus robalito	Robalo aleta amarilla	Noroeste
Centropomus undecimalis	Robalo blanco	Golfo, Peninsula de Yucatán
Centropomus viridis	Robalo plateado	Sur, Centro-Occidente, Noroeste
Micropterus salmoides	Lobina negra	Norte, Centro-Este, Noreste
Lepomis cyanellus	Pez sol	Norte
Lepomis macrochirus	Mojarra oreja azul	Centro-Occidente, Noreste
Lepomis megalotis	Mojarra gigante	Norte
Medialuna californiensis	chopa medialuna	Noroeste
Kyphosus ocyurus	Salema	Centro-Occcidente
Kyphosus analogus	chopa rayada	Peninsula de Yucatán
Kyphosus elegans	chopa de CortÃ©s	Noroeste, Sue, Centro-Occidente
Scarus coeruleus	Loro azul	Peninsula de Yucatán
Nicholsina usta	loro esmeralda	Peninsula de Yucatán, Golfo
Gerres cinereus	mojarra trompetera	Peninsula de Yucatán
Diapterus auratus	Mojarra blanca	Peninsula de Yucatán, Golfo
Eugerres plumieri	Mojarra rayada	Golfo
Trichiurus lepturus	Cintilla	Golfo
Stereolepis gigas	Pescara	Noroeste
Peprilus burti	palometa del Golfo	Golfo
Peprilus paru	palometa pÃ¡mpano	Golfo
Peprilus simillimus	palometa plateada	Noroeste
Petenia splendida	Tenguayaca	Sur
Dormitator latifrons	DormilÃ³n gordo del PacÃ­fico	Noroeste, Sur, Centro-Occidente
Gobiomorus maculatus	dormilÃ³n manchado	Sur
Paralichthys aestuarius	lenguado de CortÃ©s	Noroeste
Paralichthys lethostigma	Lenguado de florida	Noreste, Golfo
Paralichthys woolmani	lenguado huarache	Noroeste
Ictalurus balsanus	Bagre del Balsas	Centro-Este
Ictalurus dugesii	Bagre del Lerma	Centro-Occcidente
Ictalurus furcatus	bagre azul	Norte
Ictalurus lupus	Bagre lobo	Norte
Ictalurus meridionalis	Bagre del Usumacinta	Sur
Ictalurus mexicanus	Bagre del Verde	Centro-Occcidente
Ictalurus punctatus	bagre de canal	Noreste, Norte, Centro-Occidente
Bagre marinus	Bagre bandera	Golfo
Bagre panamensis	Bagre chihuil	Noroeste
Ariopsis felis	Bagre boca chica	Golfo, Peninsula de Yucatán, Noreste
Ariopsis seemanni	bagre tete	Centro-Occcidente, Noreste, Sur
Opisthonema bulleri	Sardina crinuda azul	Noroeste, Sur, Centro-Occidente
Opisthonema libertate	sardina crinuda	Noroeste
Opisthonema medirastre	sardina crinuda machete	Noroeste, Centro-Occidente, Sur
Guavina guavina	Guavina	Golfo, Peninsula de Yucatán
Nematistius pectoralis	Papagallo	Noroeste, Centro-Occidente
Rachycentron canadum	Cobia	Peninsula de Yucatán, Golfo
Xiphias gladius	Pez espada	Peninsula de Yucatán, Golfo
Prionotus evolans	Vaca rayada	Golfo
Astyanax fasciatus	Sardinita Coli-roja	Golfo
Bramocharax caballeroi	Pepesca de catemaco*	Golfo
Hypsopsetta guttulata	Lenguado diamante	Noroeste
Microstomus pacificus	Lenguado resbaloso	Noroeste
Citharichthys xanthostigma	Lenguado alón	Noroeste
Xystreurys liolepis	Lenguado cola de abanico	Noroeste
Symphurus plagiusa	lengua gris	Peninsula de Yucatán, Golfo, Noreste
Cyprinus carpio	Carpa comÃºn	Centro-Occcidente, Norte
Algansea tincella	Pupo del Valle	Centro-Occcidente
Harengula thrissina	sardinita plumilla	Centro-Occcidente, Noreste, Sur
Lile gracilis	sardinita agua dulce	Sur, Centro-Occidente, Noroeste
Lile stolifera	sardinita rayada	Noroeste, Centro-Occidente, Sur
Sardinops sagax	Sardina Monterrey	Noroeste
Engraulis mordax	Anchoveta norteña	Noroeste
Cetengraulis mysticetus	Anchoveta bocona	Noroeste
Anchoa ischana	Anchoa chicotera	Noroeste
Anchoa mitchillo	Anchoa de caleta	Noroeste
Anchovia macrolepidota	Anchoveta escamuda	Noroeste, Sur, Centro-Occidente
Belenesox belizanus	Picudito	Sur
Poecilia butleri	Topote del PacÃ­fico	Noroeste
Poecilia catemaconis	Topote de Catemaco	Golfo
Poecilia latipunctata	Topote del TamesÃ­	Norte
Poecilia sulphuraria	Topote de Teapa	Sur
Girardinichthys viviparus	Mexclapique de la Cuenca de MÃ©xico*	Centro-este
Goodea atripinnis	Tiro	Centro-Occidente, Centro-Este
Profundulus hildebrandi	escamudo de San CristÃ³bal	Sur
Synodus foetens	chile apestoso	Peninsula de Yucatán, Golfo, Noreste
Synodus intermedius	Chile manchado	Peninsula de Yucatán, Golfo
Synodus lacertinus	chile lagarto	Noroeste
Megalops atlanticus	Sábalo	Peninsula de Yucatán,Sur, Golfo
Elops saurus	Machete del atlántico	Noreste, Noroeste
Hyporhamphus gilli	pajarito cholo	Noroeste
Hyporhamphus rosae	pajarito californiano	Noroeste
Hyporhamphus snyderi	pajarito choca	Noroeste
Euleptorhamphus viridis	agujeta alargada	Noroeste, Centro-Occidente, Sur
Mugil cephalus	Lisa rayada	Noroeste, Noreste, Golfo, Peninsula de Yucatán
Mugil curema	Lebrancha	Noroeste, Noreste
Mugil hospes	lisa hospe	Noroeste, Sur
Chirostoma bartoni	charal de La Caldera	Centro-Occidente
Chirostoma chapalae	charal de Chapala	Centro-Occidente, Centro-Este
Chirostoma jordani	Charal del Mezquital	Centro-Este
Chirostoma patzcuaro	Charal pinto	Cetro-Occidente
Merluccius albidus	merluza profunda	Golfo
Merluccius productus	merluza norteña	Noroeste
Atherinopsis californiensis	Pejerrey mocho	Noroeste
Hemiramphus balao	Agujeta balao	Peninsula de Yucatán
Albula vulpes	Macabí	Peninsula de Yucatán
Pristis pectinata	Pez sierra peine	Sur, Centro-Occidente
Pristis pristis	Pez sierra común	Noroeste
Paralabrax nebulifer	Verdillo	Noroeste
Eriosema grandiflorum	Igualama, igualamilla, hoja de guayabillo	Centro-Occidente, Centro-Este, Sur, Golfo, Noroeste
Pithecellobium dulce	Guamúchil, huamúchil	Noroeste, Centro-Occidente, Centro-Este
Acacia angustissima	Arí, guajillo	Sur, Centro-Occidente, Centro-Este, Noreste
Lemna gibba	Chichicastle, lenteja de agua	Centro-Este, Centro-Occidente
Phaseolus coccineus	Ayocote, frijol, bótil, patol	Centro-Este, Centro-Occidente, Sur,Golfo
Leucoena esculenta	Guaje, uaxin, huasi, cascahuite	Sur, Centro-Este, Centro-Occidente
Phaseolus acutifolius	Frijol tépari, frijol escomite, yoti muri, pawi	Toda la república
Inga xalapensis	Jinicuil, cojinicuil, algodoncillo, chalahuite	Sur, Centro-Este, Golfo
Enterolobium cyclocarpum	Guanacaste, semilla de píich, parota	Peninsula de Yucatán, Golfo, Sur, Centro-Este, Centro-Occidente
Phaseolus vulgaris	Alubias	Centro-Este, Noreste
Cicer arietinum	Garbanzo	Centro-Occidente, Sur
Vicia faba	Haba	Centro-Este, Noreste
Lens culinaris	Lenteja	Centro-Occidente, Centro-Este, Penisnula de Yucatán
Pisum sativum	Arverjón	Centro-Occidente, Sur
Arachis hypogaea	Cacahuate	Golfo
Pisum sativum	Chicharos	Centro-Occidente, Sur
Crotalaria pumila	Chepil, chipil	Sur, Centro-Occidente
Crotalaria longirostrata	Chipilín, garbancillo, tronador	Sur
Zea diploperennis	Maíz chapule	Centro-Occidente
Zea mays	Maíz pepitilla	Noroeste, Centro-Occidente y Sur
Maranta arundinacea	Harina de sagú, sagú de montaña	Noroeste, Penisnula de Yucatán, Sur
Amaranthus cruentus	Amaranto, alegría	Centro-Este, Centro-Occidente, Noroeste
Amaranthus hypocondriacus	Amaranto, alegría	Centro-Este, Noroeste
Avena fatua	Avena*	Centro-Este, Centro-Occidente, Noreste
Oryza sativa L.	Arroz	Noroeste, Centro-Occidente, Noreste, Centro-Este, Sur, Golfo, Penisnula de Yucatán
Helianthus annuus	Girasol	Toda la república
Arachis hypogaea	Cacahuate	Golfo
Salvia hispanica	Chía	Centro-Occidente, Noroeste, Noreste, Sur
Theobroma cacao	Cacao	Sur, Centro-Occidente
Triticun aestivum	Trigo	Centro-Este
Carya illinoinensis	Nuez pecana	Noreste, Centro-Occidente, Centro-Este, Norte
Prunus amygdalus	Almendras	Golfo, Sur
Sesamum indicum	Ajonjolí	Centro-Occidente, Sur
Linum usitatissimum	Linaza	Centro-Este
Amoreuxia palmatifida	Saiya	Noroeste
Dahlia Cav.	Acocoxochitle	Noroeste
Ipomoea batatas	Camote, papa dulce	Centro-Este, Norte, Sur, Centro-Occidente, Pensinsula de Yucatán
Solanum tuberosum	Papa	Toda la república
Manihot esculenta	Yuca	Golfo, Sur, Peninsula de Yucatán, Noroeste
Colocasia esculenta	Malanga, oreja de elefante, taro	Golfo, Peninsula de Yucatán, Noroeste
Sechium edule	Chinchayote, raíz del chayote	Centro-Este, Golfo, Sur, Noroeste
Colochortus barbatus	Ayatito	Centro-Este, Centro-Occidente, Sur y Norte
Arracacia xanthorrhiza	Arracacha	Noroeste
Brassica napus	Nabo	Centro-Este
Pachyrhizus erosus	Jicama	Centro-Occidente, Sur
Lyophyllum decastes	Hongo clavito	Centro-Este, Centro-Occidente
Entoloma abortivum	Hongo totolcozcatl	Noroeste
Pleurotus ostreatus	Hongo blanco de mayo	Centro-Este, Centro-Occidente, Norte
Hygrophorus russula	Hongo carnita	Centro-Occidente
Armillaria mellea	Hongo cazahuate	Centro-Ocidente, Noroeste
Gymnopus dryophilus	Hongo tejamanilero, campanita	Centro-Occidente, Noreste
Laccaria laccata	Agrito	Centro-Occidente
Agaricus augustus	Hongo mazayel, champiñón de bosque	Centro-Occidente
Agaricus bisporus	Champiñón de monte	Centro-Este, Centro-Occidente
Agaricus arvensis	Champiñón de llano, grande u hongo blanco	Centro-Este, Centro-Occidente
Agaricus campestris	Champiñón de prado	Centro-Occidente, Noreste, Norte
Macrolepiota procera	Hongo de codorniz	Centro-Occidente, Sur
Lycoperdon perlatum	Pedo de coyote	Centro-Occidente, Noreste, Noroeste, Norte
Amanita caesarea	Yema de huevo	Centro-Occidente, Centro-Este, Norte, Sur
Amanita calyptroderma	Hongo tuza	Centro-Occidente
Amanita rubescens	Amanita rojiza	Centro-Occidente, Sur, Norte
Clitocybe gibba	Tejamanilero	Centro-Este, Centro-Occidente
Clitocybe infundibuliformis	Hongo corneta	Centro-Este
Lepista irina	Hongo clavito	Sur, Centro-Este
Tricholoma equestre	Hongo canario	Centro-Este
Tricholoma magnivelare	Ocote	Sur, Golfo, Centro-Este, Centro-Occidente
Cantharellus cibarius	Rebozuelo	Centro-Occidente
Clavulina cinerea	Hongo escobeta	Golfo, Centro-Este, Centro-Occidente
Fomitopsis pinicola	Hongo de Oyamel	Centro-Este, Golfo, Centro-Occidente
Sparassis crispa	Hongo coliflor	Centro-Occidente
Russula brevipes	Hongo enchilado	Centro-Este, Centro-Occidente, Sur
Lactarius indigo	Hongo azul	Centro-Este, Centro-Occidente, Sur, Noreste
Lactarius deliciosus	Enchilado	Centro-Este
Butyriboletus appendiculatus		Centro-Occidente
Boletus luridus	Cema	Centro-Occidente
Boletus edulis	Homgo cemita rey	Centro-Este, Centro-Occidente, Noreste
Tylopilus felleus	Hongo chana	Centro-Occidente
Suillus granulatus	Panza babosa	Centro-Este
Suillus brevipes	Hongo cemita	Sur
Hygrophoropsis aurantiaca	Enchilado	Centro-Este, Centro-Occidente
Turbinellus floccosus	Corneta	Centro-Este, Sur, Golfo
Ramaria formosa	Escobeta	Centro-Occidente
Ramaria botrytis	Hongo pata de pajáro	Centro-Occidente, Sur
Ramaria stricta	Mano de santo	Centro-Este, Centro-Occidente, Sur, Golfo
Ustilago maydis	Cuitlacoche	Centro-Occidente, Noreste, Sur
Helvella elastica	Hongo oreja de ratón	Centro-Este
Morchella elata	Bolsita de borrego negra	Centro-Este, Golfo
Morchella esculenta	Bolsita de borrego amarilla	Centro-Este
Hypomyces lactifluorum	Oreja de puerco	Centro-Occidente, Centro-Este, Golfo, Sur, Noreste
Neolentinus lepideus	Jolete	Centro-Occidente
Pseudofistulina radicata	Nelhuayonanácatl	Sur, Golfo, Peninsula de Yucatán
Marasmius oreades	Senderuela	Centro-Este
Agaricus sylvaticus	Gavilán, hongo de zacate	Golfo
Ampullocilitocybe clavipes	Trompa, Mantequilla, pata gorda	Golfo, Sur
Helvella crispa	Orejita blanca	Sur, Centro-Occidente, Centro-Este, Noreste
Gyromitra infula	Oreja de ratón, Casquillo, silla de montar	Centro-Este, Centro-Occidente
Helvella lacunosa	Hongo charamusquita, Oreja de Judas	Centro-Este, Sur, Golfo, Centro-Occidente
Hypomyces macrosporum	Oreja de puerco, chintazcal	Centro-Occidente
Lactarius salmonicolor	Hongo de oyamel, enchilado de monte	Centro-Este, Sur
Lepista nuda	Xocoyol, hongo de agua, aguita	Centro-Occidente, Noreste
Schizophyllum commune	Nanacate, Oreja de palo	Centro-Este, Noreste, Peninsula de Yucatán,
Polyporus tenuiculus	Chinanteco	Golfo
Auricularia polytricha	Oreja babosa, oreja de cochi	Golfo, Sur, Centro-Occidente
Auricularia delicata	Chole, Oreja babosa	Sur, Centro-Occidente
Pleurotus djamor	Oreja de jonote	Centro-Este, Golfo, Sur, Penisnula de Yucatán
Agaricus subrufescens	Cogumelo de Sol	Golfo
Lentinula edodes	Hongo shiitake	Centro-Occidente
Agaricus placomyces	Mazayel	Centro-Occidente
Agaricus sylvicola	Champinón grande	Golfo
Agaricus subrutilescens	Pipíla	Sur, Golfo, Centro-Este
Aleuria aurantia	Cazoleta naranja	Centro-Este,Centro-Occdidente
Amanita crocea	Pollita	Centro-Occidente
Amanita franchetti	Yemita	Centro-Este, Golfo
Amanita fulva	Yema ceniza	Centro-Occidente
Amanita gemmata	Cabeza prieta	Centro-Occidente, Golfo, Sur
Amanita tecomate	Tecomate	Centro-Este
Amanita tuza	Hongo tuza	Centro-Occidente, Sur
Amanita vaginata	Hongo de ardilla	Centro-Este
Armillaria ostoyae	Babosito, Hongo de tronco o de miel	Sur, Centro-Este
Auricularia auricula	Oreja de Judas	Centro-Este
Auricularia cornea	Oreja negra	Centro-Este, Centro-Occidente, Penisnula de Yucatán
Auricularia fuscosuccinea	Chicharroncillo	Golfo, Noreste
Boletellus ananas	Cepa	Centro-Occidente, Sur, Golfo
Boletellus betula		Centro-Este, Golfo, Sur
Boletellus russelli	Panza roja	Centro-Occidente, Sur
Boletus aestivalis	Cema	Centro-Este, Centro-Occidente
Boletus appendiculatus	Hongo hongorado	Golfo, Centro-Este
Boletus barrowsii	Hongo de encino	Noroeste
Boletus chrysenteron	Galamo	Centro-Este, Sur, Noreste
Boletus erythropus	Galambo, hongorado	Centro-Este
Boletus frostii	Hongo de madroño, nema	Noroeste, Centro-Este
Boletus luridus	Galambo bueno	Centro-Este, Centro-Occidente
Boletus pinicola	Hongo pambazo	Centro-Este
Boletus pinophilus	Hongo viejo	Centro-Occidente, Sur
Calocera viscosa	Deditos de palo	Noreste, Sur, Noroeste, Centro-Este
Calvatia cyathiformis	Bola, patarata	Centro-Occidente, Centro-Este, Sur
Cantharellus tubaeformis	Duraznillo, chimequito	Centro-Occidente, Golfo, Centro-Este
Chalciporus piperatus	Poposo	Sur, Centro-Este
Chroogomphus rutilus	Capulín, hongo carnita de res	Centro-Este, Centro-Occidente, Sur
Clavaria zollingeri	Zeta violeta	Centro-Este
Clavariadelphus pistillaris	Amarillo	Centro-Este, Centro-Occidente
Clavariadelphus truncatus	Amarillo, chichis de vaca	Centro-Occidente, Centro-Este, Norte, Sur
Clavicorona pyxidata	Zetas coral	Centro-Este, Centro-Occidente, Noreste, Noroeste
Clavulina coralloides	Patitas blancas	Centro-Este, Golfo
Clavulina cristata		Centro-Este
Clavulina rugosa	Clavito	Centro-Occidente, Centro-Este
Clitocybe geotropa		Centro-Este
Clitocybe clavipes	Chivito	Centro-Este, Golfo, Sur
Clitocybe squamulosa	Hongo oreja	Centro-Este
Collybia butyaracea	Corralitos	Centro-Este, Centro-Occidente
Collybia cookei		Centro-Este
Collybia polyphylla	Olorosa	Centro-Occidente, Centro-Este, Golfo
Cortinarius violaceus		Golfo, Sur, Noreste, Centro-Occidente, Centro-Este
Craterellus cornucopioides	Negrito	Centro-Occidente, Centro-Este
Cronartium quercuum	Hongo de los pinos	Centro-Este
Daldinia concentrica	Bola de madera	Centro-Occidente, Centro-Este, Peninsula de Yucatán
Enteridium lycoperdon		Centro-Este
Entoloma clypeatum	Hongo de encino, cabezona	Centro-Este, Sur
Entoloma giganteum	Hongo de bola	Centro-Este, Golfo
Fistulina guzmanii	Chilnanacate	Centro-Este, Centro-Occidente, Sur
Flammulina velutipes	Jarilla	Centro-Este, Centro-Occidente
Floccularia luteovirens		Centro-Este
Fuligo septica		Centro-Este
Gautieria chilensis		Centro-Este, Golfo
Gomphus floccosus	Clarines	Centro-Este, Sur, Noroeste, Noreste
Gomphus kauffmanii	Trompa, corneta blanca	Centro-Este, Centro-Occidente
Guepinia helvelloides		Centro-Este
Hebeloma aff. birrus		Centro-Este
Hebeloma alpinum		Centro-Este
Hebeloma fastibile	Hongo nanacate de tuza, jolete	Centro-Este
Hebeloma leucosarx		Centro-Este
Hebeloma mesophaeum	Coyotito	Centro-Este,Norte
Helvella acetabulum	Jícara	Centro-Occidente, Centro-Este, Norte
Helvella atra		Centro-Este, Norte, Centro-Occidente
Helvella compressa		Noroeste, Centro-Occidente, Centro-Este
Helvella macropus	Cucharita	Centro-Este
Hydnangium carneum		Centro-Este
Hydnum imbricatum	Cuero de venado	Centro-Este, Centro-Occidente, Sur
Hydnum repandum	Ciervita	Sur, Centro-Este, Norte
Hygrophorus chrysodon	Güerita, xilona	Centro-Este
Hygrophorus hypothejus		Centro-Occidente, Centro-Este, Sur
Hygrophorus purpurascens	Camarón	Centro-Este, Noreste, Sur
Hysterangium separabile		Centro-Este
Laccaria amethystina	Hongo de pajarito	Golfo, Centro-Este
Laccaria bicolor	Clavito de llano	Centro-Este, Centro-Occidente
Laccaria ochropurpurea		Centro-Este, Sur, Golfo
Laccata proxima	Hongo de lima	Sur, Centro-Occidente, Centro-Este
Laccata proximella		Centro-Este
Lactarius aurantiacus		Centro-Occidente, Centro-Este
Lactarius corrugis		Centro-Este, Centro-Occidente, Sur
Lactarius piperatus	Borrego	Centro-Occidente, Centro-Este
Lactarius scrobiculatus	Oreja de puerco amarillo	Centro-Occidente, Centro-Este, Noreste
Lactarius subdulcis	Enchilado cimarrón	Centro-Este, Golfo
Lactarius volemus	Hongo de leche	Centro-Occidente, Centro-Este, Noreste
Laetiporus sulphureus	Pollo del bosque, comalito	Centro-Este
Leccinum chromapes		Centro-Occidente, Centro-Este
Lentinula boryana	Cuerudo, guaje	Centro-Occidente, Centro-Este, Golfo, Noreste, Noroeste
Lentinus crinitus	Sombrerito	Sur, Peninsula de Yucatán, Golfo, Centro-Este, Noreste
Leotia lubrica	Campamocha	Centro-Este, Centro-Occidente, Noreste
Lycogala epidendrum		Centro-Este
Lycoperdon candidum	Blanquillo	Centro-Este, Golfo, Centro-Occidente
Lycoperdon pyriforme	Huevito	Centro-Este, Centro-Occidente, Noreste, Norte
Lycoperdon umbrinum	Bola de bosque	Centro-Este, Centro-Occidente
Melanoleuca melaleuca	Hongo trigueño	Centro-Este, Centro-Occidente
Melanoleuca polioleuca		Centro-Este
Morchella angusticeps	Bolsita de borrego gris	Centro-Este, Centro-Occidente, Golfo, Noroeste
Morchella conica	Elote	Centro-Este
Morchella costata	Borreguitos, Colmena	Centro-Este, Golfo
Morchella crassipes	Mazorca, Panza	Centro-Este
Mycena pura	Azulito oloroso	Centro-Este, Centro-Occidente, Golfo, Norte
Neolentinus suffrutescens		Centro-Este, Golfo, Sur
Pleurotus cornucopiae	Hongo de maguey	Centro-Occidente, Centro-Este
Pleurotus dryinus	Chuparera	Sur, Centro-Este, Centro-Occidente, Norte
Pleurotus opuntiae	Hongo de jonote	Sur, Centro-Este
Pleurotus smithii	Hongo oreja de árbol	Centro-Este, Centro-Occidente
Pluteus cervinus	Hongo de ailete, jolete	Centro-Este, Centro-Occidente
Psathyrella spadicea	Clavito rosa, xolote	Centro-Occidente, Centro-Este
Pseudohydnum gelatinosum		Centro-Este, Centro-Occidente, Sur
Ramaria apiculata	Escobate	Centro-Este, Centro-Occidente
Ramaria cacao	Escobetilla	Centro-Este
Ramaria gelatinosa	Escobetilla	Centro-Este
Ramaria aurea	Corales	Centro-Este
Ramaria cystidiophora	Escobeta amarilla	Centro-Este
Ramaria fennica	Escobetas	Centro-Este, Centro-Occidente, Sur
Ramaria flava	Barba de chivo	Centro-Este, Centro-Occidente
Ramaria flavescens	Escobetilla	Centro-Este
Ramaria flavobrunnescens	Escobeta amarilla	Centro-Este, Sur
Ramaria holorubella	Escobetilla	Centro-Este
Ramaria maculospora	Escobetilla	Centro-Este
Ramaria pallida	Escobetilla	Centro-Este
Ramaria rasilispora	Hongo coral amarillo	Centro-Este, Sur, Norte
Ramaria rubiginosa	Xelhuasnanácatl	Centro-Este, Centro-Occidente
Ramaria rubrievanescens	Escobetilla	Centro-Este
Ramaria sanguinea	Escobeta amarilla, xelhuas	Centro-Este, Centro-Occidente
Ramaria subbotrytis	Escobetilla	Centro-Este, Noreste
Ramaria vinosimaculans	Escobetilla	Centro-Este
Retiboletus griseus		Centro-Este, Centro-Occidente
Rhizopogon ochraceorubens		Centro-Este, Centro-Occidente
Russula alutacea	Hongo santiaguero	Centro-Este
Russula delica	Blanco de ocote	Centro-Este, Noreste
Russula mariae	Hongo colorado	Centro-Este
Russula mexicana	Hongo rojo	Centro-Este, Noreste
Russula nigricans	Trmba negra	Centro-Este,Centro-Occidente
Russula olivacea	Chapiado	Centro-Este, Centro-Occidente, Noreste
Russula queletti	Ardilla	Centro-Este, Centro-Occidente
Russula rosea		Centro-Este, Sur
Sarcosphaera coronaria	Calaverita	Centro-Este, Centro-Occidente
Strobilomyces confusus	Hongo correoso, panza negra	Centro-Este, Centro-Occidente
Suillus guzmanii		Centro-Este
Suillus flavogranulatus	Pancita	Centro-Este
Suillus luteus	Pegajoso	Centro-Este, Centro-Occidente, Sur
Suillus pseudobrevipes	Pancha, Tepopoz	Centro-Este, Centro-Occidente
Suillus tomentosus	Panza babosa	Centro-Este, Centro-Occidente, Sur
Tremella lutescens	Flor de palo	Centro-Este, Centro-Occidente, Sur, Norte
Tremellodendron schweinitzii		Centro-Este, Sur, Golfo
Tremellodendropsis tuberosa	Hongo pálido	Centro-Este, Golfo
Tricholoma populinum	Hongo amargo	Centro-Este, Centro-Occidente
Tricholoma saponeceum	Hongo perfumado	Centro-Este, Centro-Occidente, Sur
Tricholoma ustale	Hongo quemado	Centro-Este
Tricholoma vaccinum	Cuero de venado, chichigas¡ztle inanaga	Centro-Este, Centro-Occidente, Norte
Tuber murinum		Centro-Este, Noreste, Norte
Vascellum pratense	Corralito	Centro-Este, Centro-Occidente, Noroeste, Norte
Xerula radicata		Centro-Este
Brosimum alicastrum	Semilla de Ramón, ojite, ojoche, mojote	Penisnula de Yucatán, Noreste, Sur, Golfo
Diospyros nigra	Zapote negro costeño	Sur. Centro-Este, Golfo
Celtis pallida/ C. Iguanaea	Bainoro, granjeno amarillo, nanchibejuco, acebuche	Norte, Noreste, Noroeste, Sur, Centro-Occidente
Ferocactus pilosus	Cabuches, biznaga de lima, biznaga roja	Norte, Noreste
Yucca filifera, Yucca carnerosana, Yucca treculeana	Chochas, flor de izote, palma samandoca, palma pita, flor de palma	Noreste, Norte, Centro-Occidente, Centro-Este,
Persea schiedeana	Chinene, aguacate de manteca, pagua, chinin, chinini	Noreste, Golfo, Sur
Vitis tiliifolia	Chochogo, uva de monte, xohxogo, agraz, bejuco blanco	Centro-Occidente, Sur
Pithcellobium dulce	Guamuchil, muchite, guaymachile, huamuchil	Toda la república
Spondias monbin	Jobo, ciruela amarilla, ciruela campechana, ciruela de cerro	Golfo, Sur, Penisnula de Yucatán
Carica papaya	Papaya cimarrona, ochonite, papaya criolla, papara de monte	Sur, Pensinsula de Yucatán, Golfo, Noreste
Chamaedorea tepejilote	Tepejilote, tepexilotl, pacaya,	Golfo, Sur
Oecopetalum mexacanum	Cachichín, cacaté de mayo, tojuncuquica, jamacuquiaca	Sur
Ebenopsis ebano	Mahuacatas, pistache mexicano
Stenocereus (S. pruinosus, S. queretaroensis)	Pitaya, pitahaya	Centro-Este, Peninsula de Yucatán
Crotaegus mexicana	Tejocote, texocotl, manzanita, manzana de indias, tejocotera	Centro-Este, Centro-Occidente, Sur, Noroeste
Prunus serotina subsp. Capuli	Capulín	Centro-Este, Centro-Occidente, Sur
Pinus cembroides	Piñón rosa mexacano	Noreste, Norte, Noroeste, Centro-Este
Theobroma bicolor	Cacao blanco, cacao cimarrón, pataxte, yé-lá	Golfo, Sur
Cocos nucifera	Coco	Penisnula de Yucatán, Sur, Golfo
Vaccinium caespitosum	Arándano negro, bocharros	Noroeste, Noreste, Centro-Este
Averrhoa carambola	Carambolo	Sur, Centro-Occidente
Prunus armenica	Chabacano	Noroeste, Centro-Este
Manilkara zapota	Chicozapote	Peninsula de Yucatán, Golfo, Sur
Annona cherimola	Chirimoya	Centro-Este, Centro-Occidente, Sur
Spondias purpurea	Ciruela roja	Centro-Este, Centro-Occidente, Sur, Penisnula de Yucatán
Phoeniz dactylifera	Dátil	Noroeste, Norte, Noreste
Prunus persica	Durazno	Centro-Este, Noreste, Centro-Occidente, Sur
Rubus pringlei	Frambuesa	Centro-Este
Fragaria mexicana	Fresa silvestre, mora	Centro-Este, Noreste, Noroeste
Citrus reticulata	Mandarina	Golfo, Sur, Penisnula de Yucatán
Citrus sinensis	Naranjo, flor de azahar	Golfo, Penisnula de Yucatán, Sur, Norte
Passiflora ligularis	Granada china	Centro-Este, Centro-Occidente, Sur
Punica granatum	Granada roja	Centro-Occidente, Noreste
Annona muricata	Guanábana	Sur, Centro-Occidente, Penisnula de Yucatán
Psidium guajava	Guayaba rosa	Golfo, Centro-Occidente, Sur
Psidium guineense	Guayaba cimarrón, guayabo	Sur
Ficus carica	Higo	Centro-Este, Noreste
Litchi chinensis	Lichis	Centro-Occidente, Norte
Citrus aurantifolia	Lima	Penisnula de Yucatán, Golfo, Centro-Este, Sur
Pouteria sapota	Mamey zapote	Golfo, Sur, Penisnula de Yucatán
Malus pumila	Manzana	Centro-Occidente, Centro-Este
Cucumis melo	Melón	Sur, Golfo, Noroeste
Byrsonima crassifolia	Nanche	Golfo, Sur, Penisnula de Yucatán, Centro-Occidente
Eriobotrya japonica	Níspero	Noreste, Golfo, Centro-Occidente, Sur
Pyrus communis	Pera	Centro-Este, Noreste
Ananas comosus	Piña	Noroeste, Sur
Musa acuminata	Plátano dominico	Golfo, Sur
Citrullus lanatus	Sandía	Norte, Golfo, Sur
Opuntia megacantha	Tuna	Centro-Este
Vitis arizonica	Uva roja, cimarrona	Norte, Noreste
Vitis cinerea	Uva silvestre, uva verde	Noreste
Rubus coriifolius	Zarzamora	Noroeste, Sur
Persea americana	Aguacate	Centro-Occidente, Sur, Golfo, Noreste
Chrysophyllum cainito	Caimito	Sur, Centro-Occidente
Myrtilllocactus geometrizans	Garambullo	Centro-Occidente, Centro-Este
Citrus maxima	Pomelo, toronja	Noreste, Sur, Penisnula de Yucatán, Norte, Centro-Occidente
Mangifera indica	Mango manila	Sur, Golfo, Centro-Este, Peninsula de Yucatán
Forchammeria watsonii	Jito, palo de San Juan	Noroeste
Ziziphus obtusifolia	Garrapatilla, lotebuch	Noroeste
Solanum lycopersicum/ Lycopersicon esculentum var. leptophyllum	Jitomate	Noroeste, Centro-Este, Noreste, Centro-Occidente
Physalis sp.	Tomate	Noroeste, Centro-Occidente, Norte
Capsicum sp	Chile verde	Centro-Occidente
Sprekelia fromosissima	Cebollín	Centro-Este, Centro-Occidente, Norte, Noroeste
Jaltomata procumbens	Tomatillo	Centro-Este, Centro-Occidente
Asparagus officinali	Esparragos	Norte, Centro-Occidente
Curcibita pepo	Calabacin	Centro-Occidente, Noreste, Sur
Cucumis sativus	Pepino	Centro-Occidente, Sur, Noroeste
Curcubita pepo	Calabacita	Noroeste, Centro-Este
Brassica oleracea	Brócoli	Noreste, Centro-Este, Sur
Daucus carota	Zanahoria	Centro-Occidente, Noreste, Sur
Curcubita sp.	Calbaza	Noroeste
Sechium edule	Chayote	Golfo
Curcubita ficifolia	Chilacayote	Centro-Este
Capsicum chinense	Chile habanero	Golfo, Peninsula de Yucatán
Solanum tuberosum	Papa	Noroeste
Opuntia streptacantha	Nopal cardón	Centro-Occidente, Centro-Este, Norte
Opuntia ficus-indica	Nopal de castilla	Centro-Este, Centro-Occidente, Noreste, Norte
Brassica oleracea	Coliflor	Noreste, Centro-Este, Sur
Lactuca sativa (4 variedades)	Lechuga	Noroeste, Centro-Este, Centro-Occidente, Norte
Nasturtium officinale	Berro	Centro-Occidente, Noreste, Norte, Noroeste, Sur
Cynara scolymus	Alcachofa	Centro-Occidente, Centro-Este
Apium graveolens	Apio	Centro-Este
Capsicum annuum	Chilaca/pasilla	Centro-Occidente, Noroeste
Coriandrus sativum	Cilantro	Noroeste
Brassica oleracea	Col	Noreste, Centro-Este, Sur
Brassica oleracea var. Gemmifera	Col de bruselas	Noreste, Centro-Este, Sur
Phaseolus vulgaris	Ejote	Centro-Este, Noreste
Capsicum annuum	Pimiento morrón	Peninsula de Yucatán
Raphanus sativus	Rábano	Noroeste, Centro-Este,Sur
Solanum melongena	Berenjena	Centro-Occidente, Centro-Este, Peninsula de Yucatán, Sur
Beta vulgaris	Betabel	Centro-Este, Centro-Occidente, Golfo, Noreste
Cichorium intybus	Chicoria	Noroeste
Capsicum annuum	Chile de árbol	Noreste, Centro-Este, Sur
Capsicum annuum	Chile poblano	Noreste, Centro-Este, Sur
Medicago sativa	Germen de alfalfa	Centro-Este, Centro-Occidente, Norte
Allium porrum	Poro, puerro	Centro-Este
Opuntia joconostle	Xoconostle	Centro-Occidente, Centro-Este
Arracacia tolucensis	Neldo, acocotillo	Centro-Este
Echinocactus platyacanthus	Cabuche	Centro-Este, Centro-Occidente, Noreste
Prosopis juliflora	Mezquite, pechita, algarroba, amezquite	Noroeste, Noreste, Norte, Centro-Occidente, Sur
Euchroma gigantea	Ceiba borer beetle	Unknown
Chalcophora sp.	Unknown	Unknown
Cicindela curvata	tiger beetle	Unknown
Cicindela roseiventris	tiger beetle	Unknown
Acrocinus longimanus	harlequin beetle	Unknown
Aplagionathus spinosus	Unknown	Unknown
Aplagionathus sp.	Unknown	Unknown
Arhopalus c.f. rusticus	Unknown	Unknown
Arhopalus rusticus montanus	Unknown	Unknown
Arhopalus sp.	Unknown	Unknown
Callipogon barbatus	Unknown	Unknown
Callipogon sp.	Unknown	Unknown
Cerambyx sp.	Unknown	Unknown
Cisa sp.	Unknown	Unknown
Cyllene sp.	Unknown	Unknown
Derobrachus procerus	Unknown	Unknown
Derobrachus sp.	Unknown	Unknown
Eburia stigmatica	Unknown	Unknown
Hevorodon maxillosum	Unknown	Unknown
Lagocheirus rogersi	Unknown	Unknown
Mallodon molarius	Unknown	Unknown
Mallodon sp. cer. molarius	Unknown	Unknown
Nothopleurus cer. Maxillosus	Unknown	Unknown
Nothopleurus maxillosus	Unknown	Unknown
Ornithia mexicana	Unknown	Unknown
Polyraphis sp.	Unknown	Unknown
Prosopocera sp.	Unknown	Unknown
Stenodontes sp.	Unknown	Unknown
Stenodontes syn maxillosus	Unknown	Unknown
Stenodontes syn molarius	Unknown	Unknown
Trichoderes pini Chevr.	Unknown	Unknown
Blepharida mexicana Jacoby	Unknown	Unknown
Blepharida sp.	Unknown	Unknown
Lactica sp.	Unknown	Unknown
Leptinotarsa decemlineata Say	Unknown	Unknown
Scyphophorus acupunctatus Gyll. Syn	agave weevil	Unknown
Scyphophorus interstitialis Gyll.	agave weevil sisal weevil	Unknown
Scyphophorus sp.	agave weevil	Unknown
Metamasius spinolae (Gyll.)	cactus weevil	Unknown
Rhynchophorus cruentatus Fabr.	palmetto weevil	Unknown
Rhynchophorus palmarum (L.)	South American palm weevil	Unknown
Cybister explanatus LeConte	Unknown	Unknown
Cybister fimbriolatus (Say)	Unknown	Unknown
Cybister flavocinctus Aubé	Unknown	Unknown
Cybister occidentalis Aubé	Unknown	Unknown
Cybister sp.	Unknown	Unknown
Dytiscus habilis Say	Unknown	Unknown
Dytiscus marginicollis LeConte	Unknown	Unknown
Dytiscus sp.	Unknown	Unknown
Laccophilus apicalis Sharp syn	Unknown	Unknown
Laccophilus fasciatus Aubé	Unknown	Unknown
Laccophilus sp.	Unknown	Unknown
Megadytes giganteus (Laporte)	Unknown	Unknown
Megadytus sp.	Unknown	Unknown
Rhantus atricolor (Aubé)	Unknown	Unknown
Rhantus consimilis Motsch.	Unknown	Unknown
Rhantus sp.	Unknown	Unknown
Thermonectus basilaris (Harris)	Unknown	Unknown
Thermonectus marmoratus (Gray)	Unknown	Unknown
Thermonetus sp.	Unknown	Unknown
Chalcolepidius lafargi Chevrolat	Unknown	Unknown
Chalcolepidius rugatus Cand.	Unknown	Unknown
Deilelater mexicanus (Champ.)	Unknown	Unknown
Lacon mexicana Cand.	Unknown	Unknown
Pyrophorus mexicanus Champ. ? Syn	Unknown	Unknown
Pyrophorus pellucens Esch.	Unknown	Unknown
Dichomorpha sp.	Unknown	Unknown
Gyrinus parcus Say	Unknown	Unknown
Gyrinus plicatus Régimb.	Unknown	Unknown
Haliplus punctatus Aubé	Unknown	Unknown
Haliplus sp.	Unknown	Unknown
Peltodytes mexicanus (Wehncke)	Unknown	Unknown
Peltodytes ovalis Zimm.	Unknown	Unknown
Hololepta guidonis Marseul	Unknown	Unknown
Hololepta sp.	Unknown	Unknown
Berosus sp.	Unknown	Unknown
Dibolocelus sp. is	Unknown	Unknown
Hydrophilus	Unknown	Unknown
Tropisternus mexicanus Lap.	Unknown	Unknown
Tropisternus sublaevis (LeC.)	Unknown	Unknown
Tropisternus tinctus Sharp	Unknown	Unknown
Tropisternus sp.	Unknown	Unknown
Lucanus sp.	Unknown	Unknown
Lucanus syn virescens F.	Unknown	Unknown
Platycerus virescens (F.)	Unknown	Unknown
Meloe dugesi Champ.	Unknown	Unknown
Meloe laevis Leach	Unknown	Unknown
Meloe nebulosus Champ.	Unknown	Unknown
Meloe sp.	Unknown	Unknown
Suphisellus sp.	Unknown	Unknown
Heliscus yucatanus Bates	Unknown	Unknown
Odontotaenius striatopunctatus Perch.	Unknown	Unknown
Odontotaenius yucatanus Bates	Unknown	Unknown
Odontotaenius zodiacus Truq.	Unknown	Unknown
Oileus rimator Truqui	Unknown	Unknown
Passalus interstitialis Esch.	Unknown	Unknown
Passalus punctiger Lep. & Serv.	Unknown	Unknown
Passalus puntatostriatus Perch.	Unknown	Unknown
Passalus sp. af. punctiger Lep. & Serv.	Unknown	Unknown
Passalus sp.	Unknown	Unknown
Paxillus leachi	Unknown	Unknown
Popilius syn striatopunctatus	Unknown	Unknown
Popilius syn yucatanus	Unknown	Unknown
Popilius syn zodiacus	Unknown	Unknown
Verres corticicola	Unknown	Unknown
Canthon humectus hidalgoensis	Unknown	Unknown
Chrysina macropus	Unknown	Unknown
Cotinis mutabilis	Unknown	Unknown
Cyclocephala capitata	Unknown	Unknown
Cyclocephala fasciolata	Unknown	Unknown
Cyclocephala guttata	Unknown	Unknown
Cyclocephala sp.	Unknown	Unknown
Diloboderus sp.	Unknown	Unknown
Dynastes hercules	Unknown	Unknown
Dynastes hyllus	Unknown	Unknown
Dynastes sp.	Unknown	Unknown
Enema pan	Unknown	Unknown
Geotrupes sp.	Unknown	Unknown
Goliathus goliathus	Unknown	Unknown
Golofa imperialis	Unknown	Unknown
Golofa tersander	Unknown	Unknown
Isonychus ocellatus	Unknown	Unknown
Macrodactylus dimidiatus	Unknown	Unknown
Macrodactylus leneatus	Unknown	Unknown
Megasoma elephas	Unknown	Unknown
Megasoma elephas occidentali	Unknown	Unknown
Megasoma sp.	Unknown	Unknown
Melolontha sp.	Unknown	Unknown
Phyllophaga mexicana	Unknown	Unknown
Phyllophaga rubella	Unknown	Unknown
Phyllophaga rugipennis	Unknown	Unknown
Phyllophaga sp.	Unknown	Unknown
Phyllophaga sp. aff. Lenis (Horn)	Unknown	Unknown
Strategus aloeus aloeus	Unknown	Unknown
Strategus aloeus julianus	Unknown	Unknown
Strategus fallaciosus	Unknown	Unknown
Strategus sp.	Unknown	Unknown
Xyloryctes corniger	Unknown	Unknown
Xyloryctes ensifer	Unknown	Unknown
Xyloryctes furcatus	Unknown	Unknown
Xyloryctes teuthras	Unknown	Unknown
Xyloryctes thestalus	Unknown	Unknown
Xyloryctes sp.	Unknown	Unknown
Diloboderus sp. !!	Unknown	Unknown
Oxytelus rugulosus	Unknown	Unknown
Eleodes blapoides	Unknown	Unknown
Eleodes spinipes	Unknown	Unknown
Eleodes sp.	Unknown	Unknown
Sitophagus sp.	Unknown	Unknown
Tenebrio molitor	Unknown	Unknown
Tenebrio sp.	Unknown	Unknown
Tribolium castaneum	red flour beetle	Unknown
Tribolium confusum	confused flour	Unknown
Zophobas morio	super worm	Unknown
Zopherus jourdani	Unknown	Unknown
Zopherus mexicanus	Unknown	Unknown
Blattella germanica	cockroaches	Unknown
Blattidae gen.	cockroaches	Unknown
Periplaneta americana	cockroaches	Unknown
Periplaneta australasia	cockroaches	Unknown
Blaberus craniifer	death's head cockroache	Unknown
Pseudomops sp.	cockroaches	Unknown
Drosophila melanogaster	common fruit fly	Unknown
Ephydra hians	alkali fly	Unknown
Mosillus tibialis	Unknown	Unknown
Musca domestica	Unknown	Unknown
Stratiomyidae gen.	soldier flies	Unknown
Copestylum anna	Unknown	Unknown
Copestylum haagii	Unknown	Unknown
Eristalis sp.	Unknown	Unknown
Anastrepha ludens	Mexican fruit fly	Unknown
Baetis sp.	may fly	Unknown
Epemera sp.	may fly	Unknown
Abedus dilatutus	giant water bug	Unknown
Abedus ovatus	giant water bug	Unknown
Abedus sp.	giant water bug	Unknown
Belostoma sp.	giant water bug	Unknown
Lethocerus sp.	giant water bug	Unknown
Acanthocephala luctuosa	Unknown	Unknown
Acanthocephala sp.	giant mesquite bug	Unknown
Thasus gigas	water boatman	Unknown
Corisella edulis	water boatman	Unknown
Corisella mercenaria	water boatman	Unknown
Corisella texcocana	water boatman	Unknown
Graptocorixa abdominalis	water boatman	Unknown
Graptocorixa bimaculata	Unknown	Unknown
Graptocorixa sp.	Unknown	Unknown
Krizousacorixa azteca	Unknown	Unknown
Krizousacorixa femorata	Unknown	Unknown
Neortholomus sp.	Unknown	Unknown
Umbonia reclinata	Unknown	Unknown
Naucoridae gen.	backswimmer	Unknown
Notonecta unifasciata	Unknown	Unknown
Notonecta sp.	Unknown	Unknown
Atizies syn taxcoensis	Unknown	Unknown
Brochymena tenebrosa	Unknown	Unknown
Chlorocoris sp.	Unknown	Unknown
Dendrocerus sufultus sufultus (Distant)	Unknown	Unknown
Edessa conspersa Stal conspersa Stal	Unknown	Unknown
Edessa cordifera (Walker)	Unknown	Unknown
Edessa mexicana Stal	Unknown	Unknown
Edessa montezuma Distant	Unknown	Unknown
Edessa petersii Distant	Unknown	Unknown
Edessa rufomarginata (DeGeer)	Unknown	Unknown
Edessa taxcoensis (Ancona)	Unknown	Unknown
Edessa sp.	Unknown	Unknown
Euschistus crenator (F.)	Unknown	Unknown
Euschistus lineatus Walk	Unknown	Unknown
Euschistus strenuus Stal	Unknown	Unknown
Euschistus sp.	Unknown	Unknown
Mormidea notulata (H.-S.)	Unknown	Unknown
Pharypia fasciata (Haglund)	Unknown	Unknown
Proxys punctulatus (Palisot)	Unknown	Unknown
Dysdircus sp.	Unknown	Unknown
Aphididae gen.	aphid	Unknown
Cicada syn montezuma Distant	Unknown	Unknown
Fidicinoides picea (Walker)	Unknown	Unknown
Proarna sp.	Unknown	Unknown
Quesada gigas (Olivier)	Unknown	Unknown
Tibicen montezuma (Distant)	Unknown	Unknown
Tibicen pruinosa (Say)	Unknown	Unknown
Tibicen sp.	Unknown	Unknown
Aeneolamia postica (Walker)	spittl bug	Unknown
Dactylopius confusus (Cockerell)	cochineal insect	Unknown
Dactylopius indicus Green	cochineal insect	Unknown
Dactylopius coccus Costa	cochineal insect	Unknown
Dactylopius tomentosus Lamarck	cochineal insect	Unknown
Anthiante expensa Germar	Unknown	Unknown
Hoplophorion monogramma Germar	Unknown	Unknown
Umbonia orizabae Fowler	Unknown	Unknown
Umbonia reclinata Germar	Unknown	Unknown
Umbonia sp.	Unknown	Unknown
Bombus diligens Smith	Unknown	Unknown
Bombus ephippiatus Say	Unknown	Unknown
Bombus formosus Smith syn	Unknown	Unknown
Bombus medius Cresson	Unknown	Unknown
Bombus rufocinctus Cresson	Unknown	Unknown
Bombus sp.	Unknown	Unknown
Cephalotrigona zexmemiae (Cockerel)	Unknown	Unknown
Frieseomelitta nigra (Lepeletier)	Unknown	Unknown
Geotrigona acapulconis (Strand)	Unknown	Unknown
Lestrimelitta chamelensis Ayala	Unknown	Unknown
Lestrimelitta limao (Smith)	Unknown	Unknown
Lestrimelitta niitkip Ayala	Unknown	Unknown
Melipona beecheii Bennett	Unknown	Unknown
Melipona fasciata Latr.	Unknown	Unknown
Melipona syn fasciata guerreroensis	Unknown	Unknown
Melipona scutellaris Latr.	Unknown	Unknown
Nannotrigona perilampoides (Cresson)	Unknown	Unknown
Nannotrigona testaceicornis (Lep.)	Unknown	Unknown
Partamona bilineata (Say)	Unknown	Unknown
Partamona orizabaensis (Strand)	Unknown	Unknown
Partamona sp.	Unknown	Unknown
Plebeia frontalis	Unknown	Unknown
Plebeia mexica	Unknown	Unknown
Plebeia sp.	Unknown	Unknown
Scaptotrigona hellwegeri (Friese)	Unknown	Unknown
Scaptotrigona mexicana Guérin	Unknown	Unknown
Scaptotrigona pectoralis (Dalla Torre)	Unknown	Unknown
Trigona fulviventris Guérin-M.	Unknown	Unknown
Trigona fuscipennis Friese	Unknown	Unknown
Trigona jaty Smith	Unknown	Unknown
Trigona nigra nigra Cresson	Unknown	Unknown
Trigona sp.	Unknown	Unknown
Trigonisca pipioli Ayala	Unknown	Unknown
Trigonisca schultessi (Friese)	Unknown	Unknown
Trigonisca sp.	Unknown	Unknown
Xylocopa sp.	Unknown	Unknown
Neodiprion gillettei (Rohwer)	Unknown	Unknown
Acromyrmex octospinosus (Reich)	Unknown	Unknown
Acromyrmex rugosus (Smith)	Unknown	Unknown
Atta cephalotes (L.)	Unknown	Unknown
Atta mexicana (Smith)	Unknown	Unknown
Atta texana Buckley	Unknown	Unknown
Camponotus maculatus dumetorum	Unknown	Unknown
Camponotus sp.	Unknown	Unknown
Eciton sp.	Unknown	Unknown
Liometopum apiculatum Mayr	Unknown	Unknown
Liometopum apiculatum luctuosum Wheeler	Unknown	Unknown
Myrmecocystus melliger Forel	Unknown	Unknown
Myrmecocystus mexicanus Wesmael	Unknown	Unknown
Myrmecocystus sp.	Unknown	Unknown
Pogonomyrmex barbatus	Unknown	Unknown
Pogonomyrmex sp.	Unknown	Unknown
Ammophila sp.	Unknown	Unknown
Agelaia areata	Unknown	Unknown
Agelaia panamensis	Unknown	Unknown
Apoica sp.	Unknown	Unknown
Brachygastra azteca	Unknown	Unknown
Brachygastra lecheguana	Unknown	Unknown
Brachygastra mellifica	Unknown	Unknown
Brachygastra sp.	Unknown	Unknown
Epipona sp.	Unknown	Unknown
Eumenes sp.	Unknown	Unknown
Euodynerus sp.	Unknown	Unknown
Mischocyttarus basimacula (Cameron)	Unknown	Unknown
Mischocyttarus cubensis (Saussure)	Unknown	Unknown
Mischocyttarus pallidipectus (Smith)	Unknown	Unknown
Mischocyttarus sp.	Unknown	Unknown
Parachartegus apicalis (F.)	Unknown	Unknown
Polistes apicalis Saussure	Unknown	Unknown
Polistes canadensis (L.)	Unknown	Unknown
Polistes carnifex (F.)	Unknown	Unknown
Polistes dorsalis (F.)	Unknown	Unknown
Polistes instabilis Sauss.	Unknown	Unknown
Polistes kaibabensis Hayward	Unknown	Unknown
Polistes major Beauv.	Unknown	Unknown
Polistes sp.	Unknown	Unknown
Polistes syn	Unknown	Unknown
Polybia diguetana Buysson	Unknown	Unknown
Polybia occidentalis bohemani	Unknown	Unknown
Polybia occidentalis nigratella Buysson	Unknown	Unknown
Polybia parvulina Richards	Unknown	Unknown
Polybia striata (F.)	Unknown	Unknown
Polybia check	Unknown	Unknown
Polybia sp.	Unknown	Unknown
Stelopolybia syn areata	Unknown	Unknown
Stelopolybia syn panamensis	Unknown	Unknown
Synoeca surinama	Unknown	Unknown
Vespula squamosa	Unknown	Unknown
Vespula sp.	Unknown	Unknown
Isoptera gen.	Unknown	Unknown
Amastus ochraceator	Unknown	Unknown
Elysius superba	Unknown	Unknown
Estigmene acrea	Unknown	Unknown
Pelochyta cervina	Unknown	Unknown
Bombyx mori	Unknown	Unknown
Castnia chelone	Unknown	Unknown
Synpalamides chelone	Unknown	Unknown
Comadia redtenbacheri	Unknown	Unknown
Achlyodes pallida	Unknown	Unknown
Acronyctodes mexicaria	Unknown	Unknown
Eois mexicaria	Unknown	Unknown
Panthera pardalaria	Unknown	Unknown
Hepialus sp.	Unknown	Unknown
Phassus triangularis	Unknown	Unknown
Phassus trajesa	Unknown	Unknown
Phassus sp.	Unknown	Unknown
Schausiana trojesa	Unknown	Unknown
Aegiale hesperiaris	Unknown	Unknown
Eutachyptera psidii	Unknown	Unknown
Ascalapha odorata	Unknown	Unknown
Ascalapha agarista	Unknown	Unknown
Gerra sevorsa	Unknown	Unknown
Helicoverpa zea	Unknown	Unknown
Heliothis zea	Unknown	Unknown
Latebraria amphipyroides	Unknown	Unknown
Spodoptera exigua	Unknown	Unknown
Spodoptera frugiperda	Unknown	Unknown
Spodoptera sp.	Unknown	Unknown
Thysania agrippina	Unknown	Unknown
Anartia fatima	Unknown	Unknown
Caligo memnon	Unknown	Unknown
Chlosyne lacinia	Unknown	Unknown
Danaus gilippus thersippus	Unknown	Unknown
Danaus plexippus	Unknown	Unknown
Hamadryas sp.	Unknown	Unknown
Junonia lavinia	Unknown	Unknown
Morpho sp.	Unknown	Unknown
Nymphalis antiopia	Unknown	Unknown
Pareuptychia metaleuca	Unknown	Unknown
Vanessa annabella	Unknown	Unknown
Vanessa virginiensis	Unknown	Unknown
Papilio multicaudata	Unknown	Unknown
Papilio polyxenes	Unknown	Unknown
Protographium philolaus	Unknown	Unknown
Pterourus multicaudata	Unknown	Unknown
Catasticta flisa	Unknown	Unknown
Catasticta nimbice	Unknown	Unknown
Catasticta teutila	Unknown	Unknown
Eucheira socialis	Unknown	Unknown
Eurema lisa	Unknown	Unknown
Eurema salome jamapa	Unknown	Unknown
Leptophobia aripa	Unknown	Unknown
Phoebis agarithe	Unknown	Unknown
Phoebis philea	Unknown	Unknown
Phoebis sennae marcellina	Unknown	Unknown
Pieris sp.	Unknown	Unknown
Pontia protodice	Unknown	Unknown
Synchloe check syn callidice	Unknown	Unknown
Psychidae gen.	Unknown	Unknown
Laniifera cyclades	Unknown	Unknown
Actias luna	Unknown	Unknown
Actias truncatipennis	Unknown	Unknown
Antheraea polyphemus	Unknown	Unknown
Antheraea polyphemus mexicana	Unknown	Unknown
Arsenura armida	Unknown	Unknown
Arsenura polyodonta	Unknown	Unknown
Caio championi	Unknown	Unknown
Caio richardsoni	Unknown	Unknown
Callosamia promethea	Unknown	Unknown
Eacles aff. Ormondei yacatanensis	Unknown	Unknown
Eacles sp.	Unknown	Unknown
Hemileuca sp.	Unknown	Unknown
Hyalophora sp.	Unknown	Unknown
Hylesia coinopus	Unknown	Unknown
Hylesia frigida	Unknown	Unknown
Hylesia sp.	Unknown	Unknown
Latebraria amphipyroides	Unknown	Unknown
Paradirphia fumosa	Unknown	Unknown
Paradirphia hoegei	Unknown	Unknown
Pseudodirphia mexicana	Unknown	Unknown
Synanthedon cardinalis	Unknown	Unknown
Cocytius antaeus	Unknown	Unknown
Hyles lineata	Unknown	Unknown
Manduca sexta	Unknown	Unknown
Manduca sp.	Unknown	Unknown
Pachilia ficus	Unknown	Unknown
Corydalus cornutus	Unknown	Unknown
Corydalus sp.	Unknown	Unknown
Aeschna sp.	Unknown	Unknown
Anax sp.	Unknown	Unknown
Rhionaeschna multicolor	Unknown	Unknown
Abracris flavolineata	Unknown	Unknown
Arphia fallax	Unknown	Unknown
Boopedon flaviventris	Unknown	Unknown
Boopedon sp. af. flaviventris	Unknown	Unknown
Encoptolophus herbaceus	Unknown	Unknown
Encoptolophus otomitus	Unknown	Unknown
Melanoplus femurrubrum	Unknown	Unknown
Melanoplus mexicanus	Unknown	Unknown
Melanoplus sumichrasti	Unknown	Unknown
Melanoplus sp.	Unknown	Unknown
Ochrotettix cer. Salinus	Unknown	Unknown
Opeia sp.	Unknown	Unknown
Orphula azteca	Unknown	Unknown
Plectrotetra syn	Unknown	Unknown
Rhammatocerus nobilis	Unknown	Unknown
Rhammatocerus viatorius viatorius	Unknown	Unknown
Schistocerca cancellata paranensis	Unknown	Unknown
Schistocerca nitens	Unknown	Unknown
Schistocerca sp.	Unknown	Unknown
Schistocerca vaga vaga	Unknown	Unknown
Spharagemon equale	Unknown	Unknown
Trimerotropis sp.	Unknown	Unknown
Xanthippus corallipes	Unknown	Unknown
Acheta domesticus	Unknown	Unknown
Gryllus assimilis	Unknown	Unknown
Gryllidae gen.	Unknown	Unknown
Gryllotalpidae gen.	Unknown	Unknown
Sphenarium borrei Bolivar	Unknown	Unknown
Sphenarium macrophallicum	Unknown	Unknown
Sphenarium magnum	Unknown	Unknown
Sphenarium mexicanum	Unknown	Unknown
Sphenarium mexicanum mexicanum	Unknown	Unknown
Sphenarium purpurascens	Unknown	Unknown
Sphenarium sp.	Unknown	Unknown
Chromacris colorata (Serville)	Unknown	Unknown
Romalea colorata (Serville) syn	Unknown	Unknown
Romalea sp.	Unknown	Unknown
Taeniopoda auricornis (Walker)	Unknown	Unknown
Taeniopoda bicristata Bruner.	Unknown	Unknown
Taeniopoda sp.	Unknown	Unknown
Tropinotus mexicanus Brunner syn	Unknown	Unknown
Xyleus discoideus mexicanus (Bruner)	Unknown	Unknown
Stenopelmatus sp.	Unknown	Unknown
Conocephalus cinereus Thun.	Unknown	Unknown
Conocephalus ictus (Scud.)	Unknown	Unknown
Idiarthron subquadratum S. & P.	Unknown	Unknown
Microcentrum sp.	Unknown	Unknown
Microcentrum totonacum	Unknown	Unknown
Neoconocephalus triops	Unknown	Unknown
Petaloptera zendala Saussure	Unknown	Unknown
Pyrgocorypha sp.	Unknown	Unknown
Scudderia mexicana	Unknown	Unknown
Stilpnochlora azteca	Unknown	Unknown
Stilpnochlora quadrata	Unknown	Unknown
Stilpnochlora thoracica	Unknown	Unknown
Bacteria sp.	Unknown	Unknown
Metylophorus barretti	Unknown	Unknown
Leptonema sp.	Unknown	Unknown
Oecetis disjuncta	Unknown	Unknown
Notonectidae latreille	Unknown	Unknown
Acentrocneme hesperiaris	Unknown	Unknown
Metcalfiella monograma	Unknown	Unknown
Euschistus taxcoensis	Unknown	Unknown
Thasus gigas	Unknown	Unknown
